# Supplementary material for: Consensus Guideline for the Management of Colorectal Cancer with Peritoneal Metastases
Source: bioRxiv or medRxiv preprint supplement (doi:10.1101/2024.05.07.24305476), 2024-05-09
Supplement: Supplementary file [file media-2.pdf]

|                                                                                                                                                                                                                                                                                                                                                                                          |
|------------------------------------------------------------------------------------------------------------------------------------------------------------------------------------------------------------------------------------------------------------------------------------------------------------------------------------------------------------------------------------------|
| <p><u><sup>4</sup>Surveillance:</u></p> <p>H&amp;P and CEA every 3-6 months for 2 years then every 6 months for a total of 5 years; CT C/A/P every 3-6 months for 2 years then every 6-12 months for a total of 5 years; Colonoscopy in 1 year after surgery except if no preoperative colonoscopy then colonoscopy in 3-6 months; Consider ctDNA as an additional surveillance tool</p> |
|------------------------------------------------------------------------------------------------------------------------------------------------------------------------------------------------------------------------------------------------------------------------------------------------------------------------------------------------------------------------------------------|

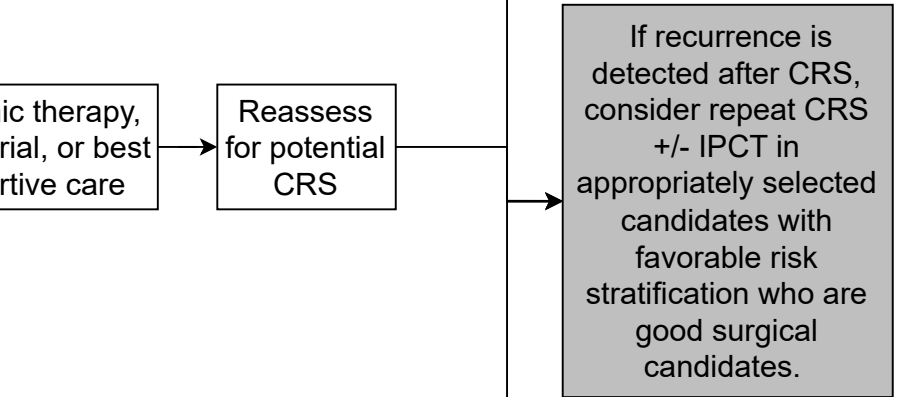

H&P: History and Physical  
CEA: Carcinoembryonic antigen  
TMB: Tumor mutational burden  
IPCT: Intraperitoneal chemotherapy (includes HIPEC and EPIC)  
HIPEC: Hyperthermic intraperitoneal chemotherapy  
EPIC: Early postoperative intraperitoneal chemotherapy  
CRS: Cytoreductive surgery  
CT C/A/P: Computed tomography of chest/abdomen/pelvis  
MRI: Magnetic resonance imaging  
PET-CT: Positron emission tomography-Computed tomography  
LN: Lymph node  
PSDSS: Peritoneal Surface Disease Severity Score  
MSI: Microsatellite instability  
ctDNA: circulating tumor DNA

<sup>2</sup>Refer to principles of surgery for patients with resectable liver and/or lung metastases in the context of peritoneal metastasis

<sup>3</sup>Clinical/pathology features:

- Low risk: Disease-free interval >1 yr, LN-, Low Grade, Low PCI, Left-sided primary cancer
- High risk: Disease-free interval < 1yr, LN+, High Grade, Signet Ring, High PCI, Right-sided primary cancer
- Consider PSDSS for Risk Stratification

4 If incomplete CRS, consider systemic therapy, clinical trial, or best supportive care

2023  
**Consensus  
Guidelines**  
for Peritoneal Surface Malignancies
